# Supplementary material
Source: ML conference proceedings conference paper supplement (https://proceedings.neurips.cc/paper_files/paper/2018/hash/0f0ee3310223fe38a989b2c818709393-Abstract.html)
Supplement: Supplementary file [file 0f0ee3310223fe38a989b2c818709393-Supplemental.zip]

# SUPPLEMENTARY MATERIAL

## 6.1 Full algorithm with comments

---

### Algorithm 2: Dynamical model learning with ASI

---

**Input :** Dataset of  $N$  trajectories  $\{(x_1, x_2, \dots, x_{T_i})\}_{i=1}^N$ ; each  $x_t \in \mathcal{X}$   
 Differentiable model  $f : \mathcal{X} \rightarrow \mathcal{X}$  with parameters  $\theta$   
 Loss function  $\mathcal{L} : \mathcal{X} \times \mathcal{X} \rightarrow \mathbb{R}$   
 Matching-horizon  $H \in \mathbb{N}$   
 Exploration schedule  $\mu : \mathbb{N} \rightarrow [0, 1]$   
 Scheduled sampling temperatures  $\epsilon : \mathbb{N} \rightarrow [0, 1]$

$\theta \leftarrow$  Initialize model parameters  
 training\_step  $\leftarrow 0$

**repeat**

$x \leftarrow$  get next trajectory from dataset

$t \leftarrow 1, u \leftarrow 1$   $\triangleright$  Ground truth timestep  $t$  and abstract timestep  $u$

$l \leftarrow 0$   $\triangleright$  Trajectory loss

$p \leftarrow x_1$   $\triangleright$  Next input to the dynamics model  $f$

**while**  $t < |x|$  **do**

$\hat{x}_u \leftarrow f(p)$

$T \leftarrow \min(t + H, |x|)$   $\triangleright$  Upper time step limit

**if** Bernoulli( $\mu(\text{training\_step})$ ) = 0 **then**

$t \leftarrow \arg \min_{t' \in \{t+1..T\}} \mathcal{L}(x_u, x_{t'})$   $\triangleright$  Temporal matching

**else**

$t \sim \text{unif}\{t + 1, T\}$   $\triangleright$  Exploration

**end**

$l \leftarrow l + \mathcal{L}(x_u, x_t)$   $\triangleright$  Accumulate trajectory loss

**if** Bernoulli( $\epsilon(\text{training\_step})$ ) = 0 **then**

$p \leftarrow \hat{x}_u$   $\triangleright$  Scheduled sampling (Bengio et al., 2015)

**else**

$p \leftarrow x_t$   $\triangleright$  Take ground truth frame as next model input

**end**

$u \leftarrow u + 1$

**end**

Perform a gradient descent step on  $\theta$  to reduce  $l$

training\_step  $\leftarrow$  training\_step + 1

**until** stopping criterion is reached;

---

## 6.2 Model architecture

In all experiments, the model  $f$  consists of 7 convolutional layers with padding mode “same” and the following specifications, where  $\text{Conv}(a, (b, c))$  means “ $a$  kernels of size  $(b, c)$ ”:  $[\text{Conv}(n_k, (5, 5)), \text{Conv}(n_k, (5, 5)), \text{Conv}(n_k, (5, 5)), \text{Conv}(n_k, (7, 7)), \text{Conv}(n_k, (5, 5)), \text{Conv}(n_k, (1, 1)), \text{Conv}(3, (1, 1))]$ . Before the 6th layer, the three channels of the model input are concatenated to the feature map. As part of the hyperparameter search,  $n_k$  was randomly chosen from the set  $\{32, 48\}$ . We added two variations of this architecture to the hyperparameter search:

- **f-strided**: the second convolutional layer performs a strided convolution with stride 2 and the 4th convolutional layer performs a transposed convolution.
- **f-dilated**: the fourth convolutional layer uses a dilation rate of 2.

We did not observe substantial difference in the performances of our architectures.

All convolutions were used with a stride of 1. The weight initialization for all layers follows He et al. (2015). We use rectified linear units (ReLU) as activation (Glorot et al., 2011).

## 6.3 Training details

For all experiments, the Adam optimizer (Kingma and Ba, 2014) was used. For hyperparameter search, learning rates for the model  $f$  were sampled from the set  $\{1.0 \times 10^{-3}, 7.5 \times 10^{-4}, 5.0 \times 10^{-4}\}$ .

The learning rate was decayed by a factor of 0.2 after  $n_D$  steps, where  $n_D$  was sampled from the set  $\{7500, 10000, 15000\}$ . The maximum ASI horizon  $H$  was sampled from the set  $\{15, 18, 21, 25\}$ . The number of trajectories per training batch was chosen to be 2 in all experiments. As schedule of exploration for temporal matching we choose  $\mu(t) = \max(0, 1 - \frac{t}{K})$ , where  $K$  was sampled from the set  $\{7500, 10000, 15000\}$ .

The hyperparameter search described in Section 4 resulted in the parameters shown in Tables 1 and 2, which were used to produce the resulting plots.

|                      | <b>ASI</b>         | <b>ASI w/o exploration</b> | <b>fixed (<math>\Delta t = 1</math>)</b> | <b>fixed (<math>\Delta t = 2</math>)</b> |
|----------------------|--------------------|----------------------------|------------------------------------------|------------------------------------------|
| learning rate        | $5 \times 10^{-4}$ | $5 \times 10^{-4}$         | $5 \times 10^{-4}$                       | $5 \times 10^{-4}$                       |
| steps until LR decay | 15000              | 15000                      | 15000                                    | 15000                                    |
| ASI horizon          | 21                 | 18                         | -                                        | -                                        |
| Exploration steps    | 7500               | -                          | -                                        | -                                        |
| $f$ -architecture    | f-strided          | f-simple                   | f-simple                                 | f-simple                                 |
| $f$ : # of kernels   | 48                 | 48                         | 48                                       | 48                                       |

Table 1: Hyperparameters found for Room Runner

|                      | <b>ASI</b>         | <b>ASI w/o exploration</b> | <b>fixed (<math>\Delta t = 1</math>)</b> | <b>fixed (<math>\Delta t = 2</math>)</b> |
|----------------------|--------------------|----------------------------|------------------------------------------|------------------------------------------|
| learning rate        | $5 \times 10^{-4}$ | $7.5 \times 10^{-4}$       | $7.5 \times 10^{-4}$                     | $7.5 \times 10^{-4}$                     |
| steps until LR decay | 15000              | 10000                      | 15000                                    | 15000                                    |
| ASI horizon          | 21                 | 18                         | -                                        | -                                        |
| Exploration steps    | 15000              | -                          | -                                        | -                                        |
| $f$ -architecture    | f-dilated          | f-strided                  | f-dilated                                | f-strided                                |
| $f$ : # of kernels   | 48                 | 32                         | 32                                       | 32                                       |

Table 2: Hyperparameters found for Funnel Board
